# Supplementary material for: The Establishment of K-CaP (the Multicenter Korean Prostate Cancer Database)
Source: PubMed Central journal article supplement — Korean J Urol. 2013 Apr 16;54(4):229–33. doi: 10.4111/kju.2013.54.4.229 (PMC3630340; doi:10.4111/kju.2013.54.4.229), 2013-04-16
Supplement: kju-54-229-s001.pdf [file kju-54-229-s001.pdf]

**StarTrial** Study Administrator, 하용님 e-CRF System 에 오신것을 환영합니다. MY INFO LOGOUT SELECT STUDY

Prostate\_crf11 Investigator

이니셜 : JHY 시연 동역일 : 2012-02-01 무작위배정 번호 : R001

환자사 | 스텝 | CRF | Query | Audit Trail

NOTICE  
 공지사항  
 Subject  
 피험자 등록  
 피험자 관리  
 Reports  
 Study 현황  
 피험자별 진행현황  
 Section별 진행현황  
 Query Log  
 Audit Trail Log  
 데이터 내보내기(BV)

Save | 입력 완료 | 목록

Patient demographics | Preoperative parameter | Intraop parameter | Gross pathology | Post op F/U

Op Date: 2012-02-01

Chart No: 79569412

Prostate bank ID: 12568

Name: [ ]

Age: 35

Height: 177 cm

Weight: 66 kg

BMI: 21.07

Comorbidity:
 

- Yes  No
- DM
- HBP
- CVD
- URO cancer
- Other
- other11

Op Hx:  Yes  No

Race:  White  Black  Oriental

Nationality:
 

- Korean  Japanese  Russian
- Chinese  American  European

Op Date: Year / Month / Day

Approach:
 

- Laparoscopic  Robotic
- Retropubic  Perineal

Nerve sparing method:
 

- No saving  unilateral  bilateral
- if unilateral:  right  left

PLND:  No  Yes

Op time: [ ] 분

EBL: [ ] ml

Suture number:  interrupted  continuous

Postop Hb: [ ]

Operator:
 

- H  K  L  HS  C  S
- Y

**SUPPL. 1.** Screenshot of the web-based electronic case report form (e-CRF) for multicenter Korean Prostate Cancer Database (K-CaP). (A) Registration of patients. (B) Clinical parameter.

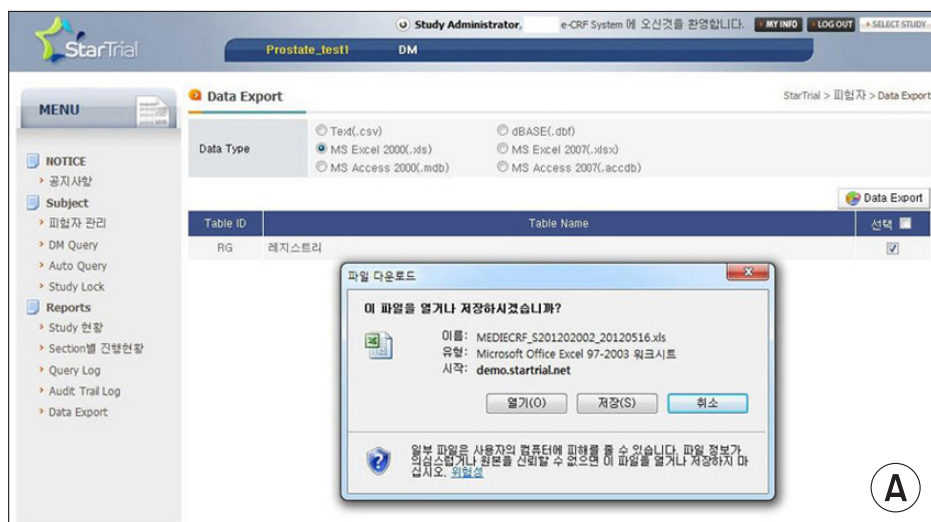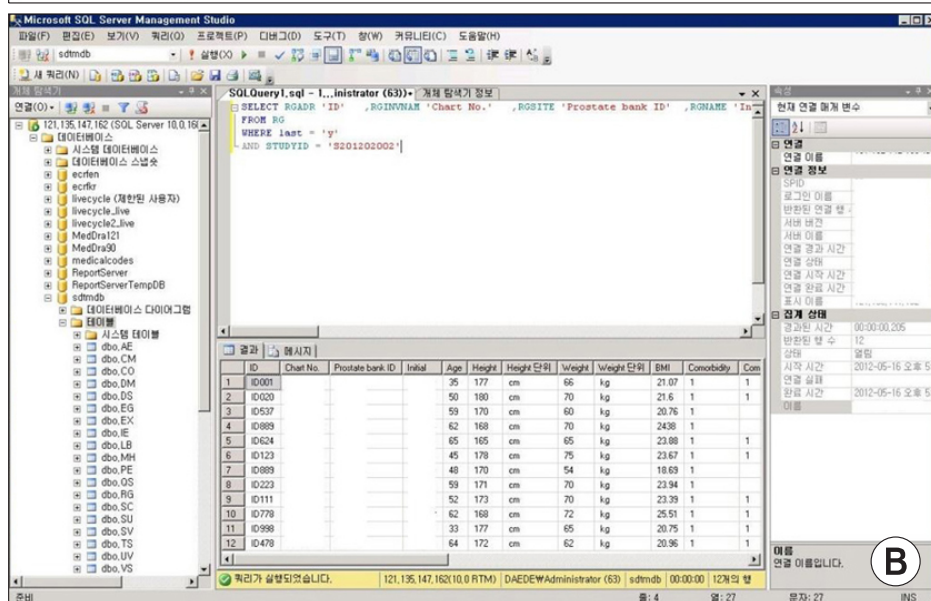

**SUPPL. 2.** Data extraction from the multicenter Korean Prostate Cancer database (K-CaP) database. (A) Data extraction with the web-based electronic case report form (e-CRF). (B) Data extraction with direct access of the SQL Server database.
